CORRECTION

# Correction: Isolation and molecular characterization of novel glucarpidases: Enzymes to improve the antibody directed enzyme pro-drug therapy for cancer treatment

Fatma B. Rashidi, Alanod D. Al-Qahtani, Sara S. Bashraheel, Shabnam Shaabani, Matthew R. Groves, Alexander Dömling, Sayed K. Goda

The Data Availability statement in [1] is incorrect as all relevant data were not provided within the article and supporting information files. With this notice, the authors provide the primary data for Figs 3, 8, 9 and 11 in S1–S4 Files.

There was a spelling error in the second author's name. The correct name is: Alanod D. Al-Qahtani. The correct citation is: Rashidi FB, Al-Qahtani AD, Bashraheel SS, Shaabani S, Groves MR, Dömling A, et al. (2018) Isolation and molecular characterization of novel glucarpidases: Enzymes to improve the antibody directed enzyme pro-drug therapy for cancer treatment. PLoS ONE 13(4): e0196254. <https://doi.org/10.1371/journal.pone.0196254>

In addition, the authors wish to acknowledge that the image in Fig 7B of this article [1] was reused in Fig 1A of a later article from the same group [2]. These images present the same experimental condition, isolation of wild-type *Pseudomonas Putida* CPG2 (Ps CPG2). Although the corresponding author referenced the original source [1] in the later article [2], he acknowledges that it should have also been indicated in the figure legend of the article [2]. The PLOS ONE Editors have assessed this issue and have no concerns about the reuse of the image from [1].

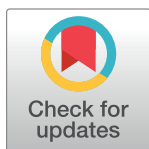

## OPEN ACCESS

**Citation:** Rashidi FB, Al-Qahtani AD, Bashraheel SS, Shaabani S, Groves MR, Dömling A, et al. (2023) Correction: Isolation and molecular characterization of novel glucarpidases: Enzymes to improve the antibody directed enzyme pro-drug therapy for cancer treatment. PLoS ONE 18(11): e0294885. <https://doi.org/10.1371/journal.pone.0294885>

**Published:** November 21, 2023

**Copyright:** © 2023 Rashidi et al. This is an open access article distributed under the terms of the [Creative Commons Attribution License](https://creativecommons.org/licenses/by/4.0/), which permits unrestricted use, distribution, and reproduction in any medium, provided the original author and source are credited.

## Supporting information

**S1 File. Quantitative data underlying Fig 3 and 8.** (XLSX)

**S2 File. Original images underlying Fig 7.** (ZIP)

**S3 File. CD Spectra and settings related to Fig 9.** (ZIP)

**S4 File. Original images underlying Fig 11.** (ZIP)

## References

1. Rashidi FB, AlQhatani AD, Bashraheel SS, Shaabani S, Groves MR, Dömling A, et al. (2018) Isolation and molecular characterization of novel glucarpidases: Enzymes to improve the antibody directed enzyme pro-drug therapy for cancer treatment. PLoS ONE 13(4): e0196254. <https://doi.org/10.1371/journal.pone.0196254> PMID: 29698433

2. Al-Qahtani A. D., Bashraheel S. S., Rashidi F. B., O'Connor C. D., Romero A. R., Domling A., & Goda S. K. (2019). Production of “biobetter” variants of glucarpidase with enhanced enzyme activity. *Biomedicine & Pharmacotherapy*, 112, 108725. <https://doi.org/10.1016/j.biopha.2019.108725> PMID: [30970523](https://pubmed.ncbi.nlm.nih.gov/30970523/)
